# Supplementary material for: Pharmacokinetics of Meropenem in People with Cystic Fibrosis—A Proof of Concept Clinical Trial
Source: PubMed Central journal article supplement (PMC7998425; doi:10.3390/antibiotics10030292), 2021-03-11
Supplement: antibiotics-10-00292-s001.pdf [file antibiotics-10-00292-s001.pdf]

Supplemental material

Figure S1: Pharmacokinetics of meropenem – raw data

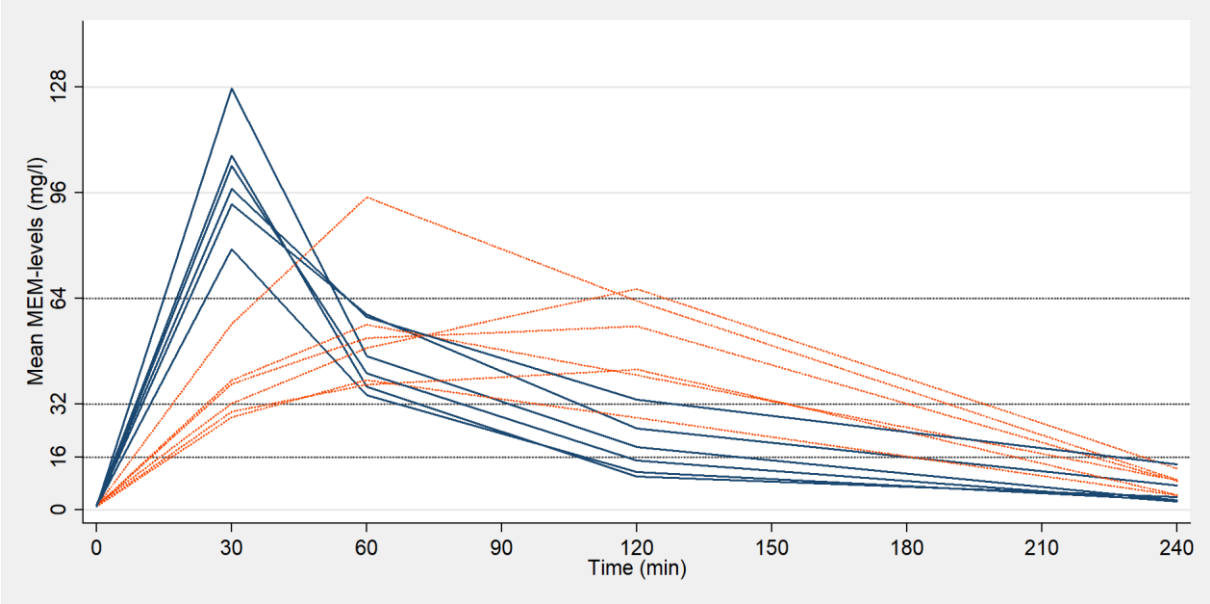

Pharmacokinetics are presented as “as is” per patient. Patients who received meropenem over 30/120 minutes are blue-/orange-colored, respectively.

**Table S1:** Meropenem serum concentrations at predefined time points

|                       | 0 min | 30 min | 60 min | 120 min | 240 min |
|-----------------------|-------|--------|--------|---------|---------|
| patient #1 (30 min)   | <1.1  | 127.6  | 46.6   | 19.1    | 2.9     |
| patient #2 (30 min)   | 1.3   | 107.4  | 37.2   | 10.1    | 3.9     |
| patient #3 (30 min)   | <1.1  | 79.0   | 24.8   | 11.5    | 2.9     |
| patient #4 (30 min)   | <1.1  | 92.5   | 59.2   | 24.7    | 7.3     |
| patient #5 (30 min)   | <1.1  | 104.3  | 41.4   | 15      | 2.6     |
| patient #6 (30 min)   | 1.6   | 97.2   | 58.4   | 33.3    | 13.8    |
| patient #7 (120 min)  | <1.1  | 56.3   | 94.7   | 63.3    | 9.1     |
| patient #8 (120 min)  | <1.1  | 29.7   | 37.9   | 42.5    | 4.5     |
| patient #9 (120 min)  | <1.1  | 28     | 39.3   | 27.9    | 4.4     |
| patient #10 (120 min) | 1.1   | 39.2   | 56.1   | 40.8    | 8.9     |
| patient #11 (120 min) | 1.5   | 32.2   | 49     | 66.9    | 12.5    |
| patient #12 (120 min) | <1.1  | 38.1   | 52     | 55.6    | 8.7     |

## **Methods and Materials**

### **Measuring systems**

Analyses were performed on an Agilent 1200 series HPLC with UV detection at 290 nm after stabilisation of the sample material and subsequent protein precipitation (Agilent Technologies, Palo Alto, USA).

### **Sample preparation, reagents and measurement**

Sample preparation and analysis were performed according to the IVD-CE certified kit Antibiotics in Serum/Plasma – HPLC (Chromsystems Instruments & Chemicals, Graefelfing, Germany). Measurement based on a 3+1 multiple point calibration. Two commercial quality controls were measured daily. Sample concentrations exceeding the measurement range were diluted according to the instruction sheet.

### **Patient material**

Materials of investigation were heparinized plasma samples of patients. The samples were stored at -80 °C continuously until starting the analyses procedure.
